# Supplementary material for: A facile synthesis of a ZIF-derived ZnS/ZnIn2S4 heterojunction and enhanced photocatalytic hydrogen evolution
Source: Royal Society of Chemistry journal article supplement (doi:10.1039/d0dt02141e), 2020-01-01
Supplement: d0dt02141e1.pdf [file d0dt02141e1.pdf]

**Facile synthesis of ZIF-derived ZnS/ZnIn<sub>2</sub>S<sub>4</sub> heterojunction and  
enhanced photocatalytic hydrogen evolution**

Huihui Song, Na Wang, Hao Meng, Yide Han, Junbiao Wu, Junli Xu, Yan Xu, Xia  
Zhang\* and Ting Sun\*

Faculty of Chemistry, College of Sciences, Northeastern University, Shenyang 110819,  
China.

Corresponding authors.

E-mail addresses:

xzhang@mail.neu.edu.cn (X. Zhang),

sun1th@163.com

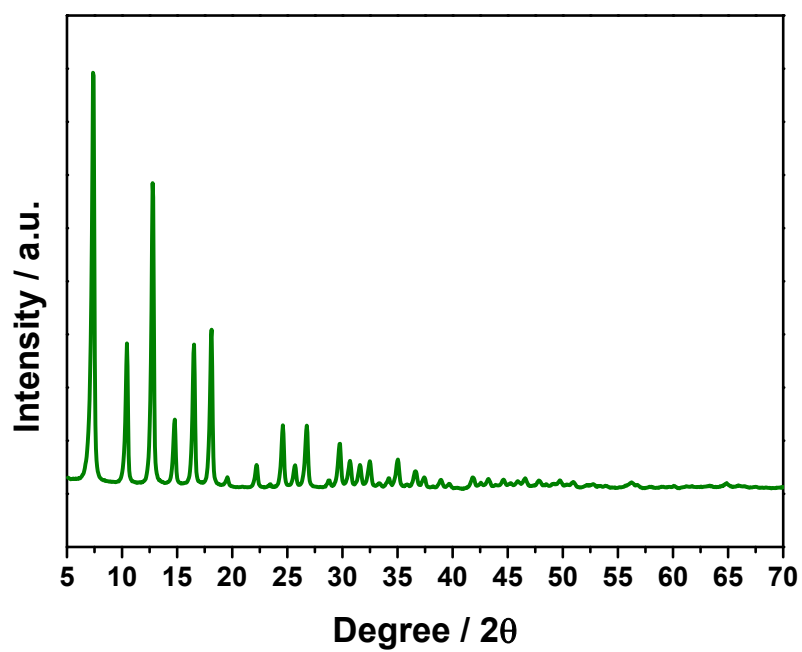

Fig. S1 XRD patterns of pure ZIF-8

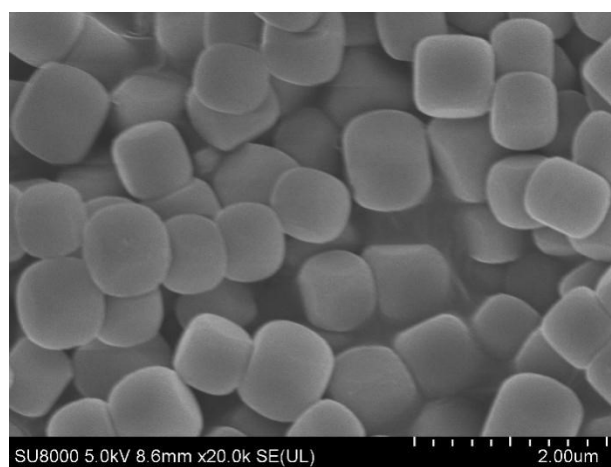

Fig. S2 SEM images patterns of pure ZIF-8

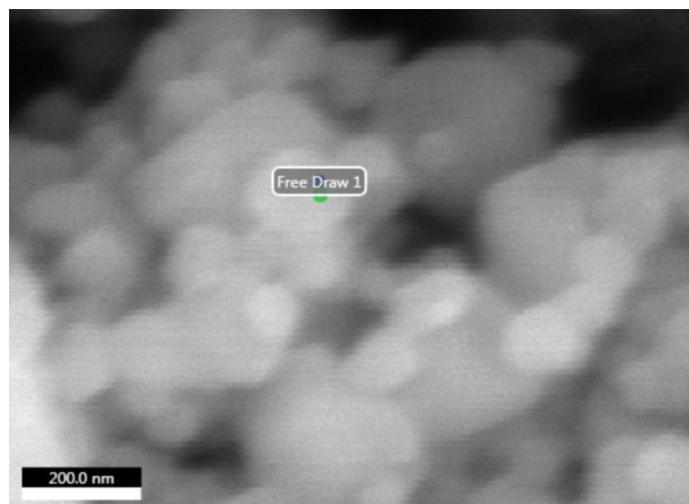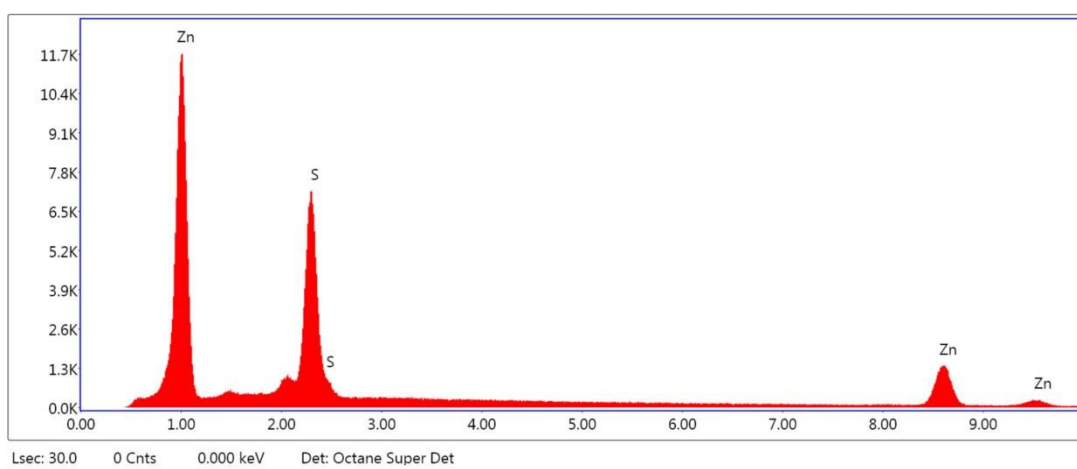

| Element | Weight % | Atomic % | Net Int. | Error % | Kratio | Z      | R      | A      | F      |
|---------|----------|----------|----------|---------|--------|--------|--------|--------|--------|
| S K     | 27.11    | 43.13    | 3241.47  | 4.60    | 0.2238 | 1.1379 | 0.9398 | 0.7199 | 1.0076 |
| ZnK     | 72.89    | 56.87    | 845.90   | 4.48    | 0.7168 | 0.9379 | 1.0109 | 0.9987 | 1.0500 |

Fig. S3 EDX of ZIF-derived ZnS

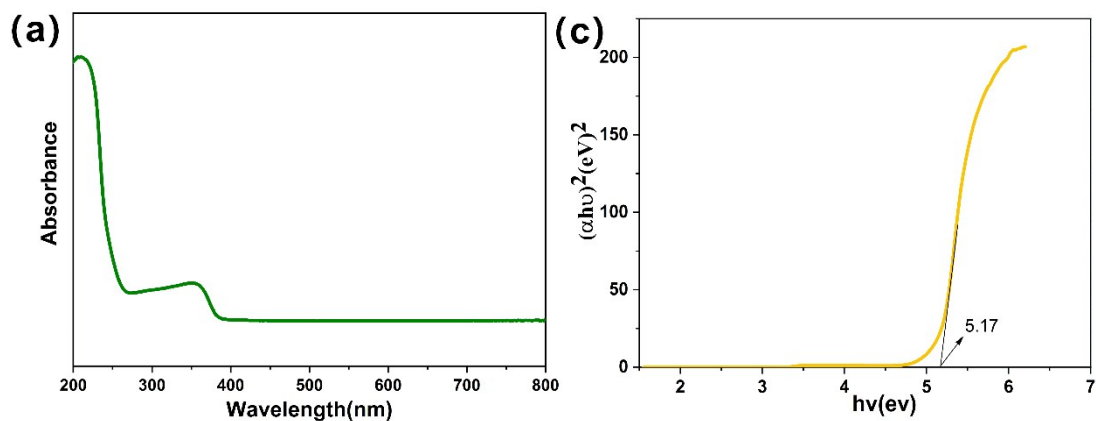

Fig. S4 UV-vis diffuse reflectance spectroscopy (a) and re-plotting curves based on Kubelka-Munk function versus the energy of light (b) of single ZIF-8.

Table S1 Comparison of photocatalytic H<sub>2</sub> production rate reported in the literature with that of ZIF-derived ZnS/ZnIn<sub>2</sub>S<sub>4</sub> in our work

| Photocatalysts                                                          | Hydrogen generation rate (μmol h <sup>-1</sup> g <sup>-1</sup> ) | Light source (Xe lamp)             | Ref.      |
|-------------------------------------------------------------------------|------------------------------------------------------------------|------------------------------------|-----------|
| ZIF-derived ZnS/ZnIn <sub>2</sub> S <sub>4</sub>                        | 453.4                                                            | 300 W (AM 1.5 filter)              | This work |
| ZnIn <sub>2</sub> S <sub>4</sub> /RGO/BiVO <sub>4</sub>                 | 4.1                                                              | 350 W (λ ≥ 420 nm cut off filters) | [1]       |
| PtS-ZnIn <sub>2</sub> S <sub>4</sub> /WO <sub>3</sub> -MnO <sub>2</sub> | 19.38                                                            | 300W (420/800 nm cut off filters)  | [2]       |
| Ag <sub>2</sub> S/ZnIn <sub>2</sub> S <sub>4</sub> /ZnS                 | 70                                                               | 300 W                              | [3]       |
| ZnIn <sub>2</sub> S <sub>4</sub> / NiS                                  | 76.6                                                             | 300 W (λ ≥ 420 nm cut off filter)  | [4]       |
| ZnIn <sub>2</sub> S <sub>4</sub> -Au-TiO <sub>2</sub>                   | 186.3                                                            | 300 W                              | [5]       |
| WS <sub>2</sub> /ZnIn <sub>2</sub> S <sub>4</sub>                       | 199.1                                                            | 300 W (λ ≥ 420 nm cut off filter)  | [6]       |
| NiS/ZnIn <sub>2</sub> S <sub>4</sub>                                    | 250                                                              | 300 W (λ ≥ 420 nm cut off filter)  | [7]       |
| rGO/TiO <sub>2</sub> nanotubes/<br>ZnIn <sub>2</sub> S <sub>4</sub>     | 462.3                                                            | 300 W (λ ≥ 420 nm cut off filter)  | [8]       |
| Ag <sub>2</sub> O quantum dot/ZnIn <sub>2</sub> S <sub>4</sub>          | 466.8                                                            | 300 W                              | [9]       |

## References

- [1] R. Zhu, F. Tian, G. Cao, F. Ouyang, *Int. J. Hydrogen Energ.*, 2017, 42, 17350-17361.
- [2] Y. Ding, D. Wei, R. He, R. Yuan, T. Xie, Z. Li, *Appl. Catal. B*, 2019, 258, 117948.
- [3] R. Wang, L. Zhao, L. Li, Q. Song, J. Huang, *J. Phys. Chem. Solids*, 2020, 136, 109148.
- [4] W. Pudkon, S. Kaowphong, S. Pattisson, P.J. Miedziak, H. Bahruji, T.E. Davies, D.J. Morgan, G.J. Hutchings, *Catal. Sci. Technol.*, 2019, 9, 5698-5711.
- [5] G. Yang, H. Ding, D. Chen, J. Feng, Q. Hao, Y. Zhu, *Appl. Catal. B*, 2018, 234, 260-267.
- [6] J. Zhou, D. Chen, L. Bai, L. Qin, X. Sun, Y. Huang, *Int. J. Hydrogen Energ.*, 2018, 43, 18261-18269.
- [7] A. Yan, X. Shi, F. Huang, M. Fujitsuka, T. Majima, *Appl. Catal. B*, 2019, 250, 163-170.
- [8] H. An, M. Li, W. Wang, Z. Lv, C. Deng, J. Huang, Z. Yin, *Ceram. Int.*, 2019, 45, 14976-14982.
- [9] Y. Xiao, Z. Peng, W. Zhang, Y. Jiang, L. Ni, *Appl. Surf. Sci.*, 2019, 494, 519-531.
